# Supplementary material for: Acute partial sleep restriction attenuates working memory performance and does not affect BDNF in young adults
Source: publisher site journal article supplement (doi:10.1515/teb-2025-0012), 2025-06-04
Supplement: Supplementary file 1 [file j_teb-2025-0012_suppl_001.docx]

**SUPPLEMENTARY MATERIAL**

**N-back script:**

- In this memory test, you will see sequence of letters appear on the screen one after another. Your job is to press the ‘A’ key whenever the letter on the screen is the same as the “N-BACK” letter.
- For example, if you are asked to do a **1-back** you have to press the ‘A’ key each time the current letter is exactly the same as the letter presented 1-position before. If the letters are different, do not respond.
- If you are asked to do a **3-back** you have to press the ‘A’ key each time the current letter is exactly the same as the letter presented 3 positions before. If the letters are different, do not respond.
- You can practice as many times as you like. After practice is finished, you will complete three rounds of the 1-back and three rounds of the 3-back in randomized order.

BE SURE TO PAY ATTENTION TO THE INSTRUCTIONS BEFORE EACH TEST BEGINS. IT WILL TELL YOU IF YOU ARE DOING A **1-BACK** OR A **3-BACK**!
